# Supplementary material
Source: PubMed Central journal article supplement (PMC4086351)
Supplement: Supp_Fig1.pdf [file Supp_Fig1.pdf]

## Supplementary Data

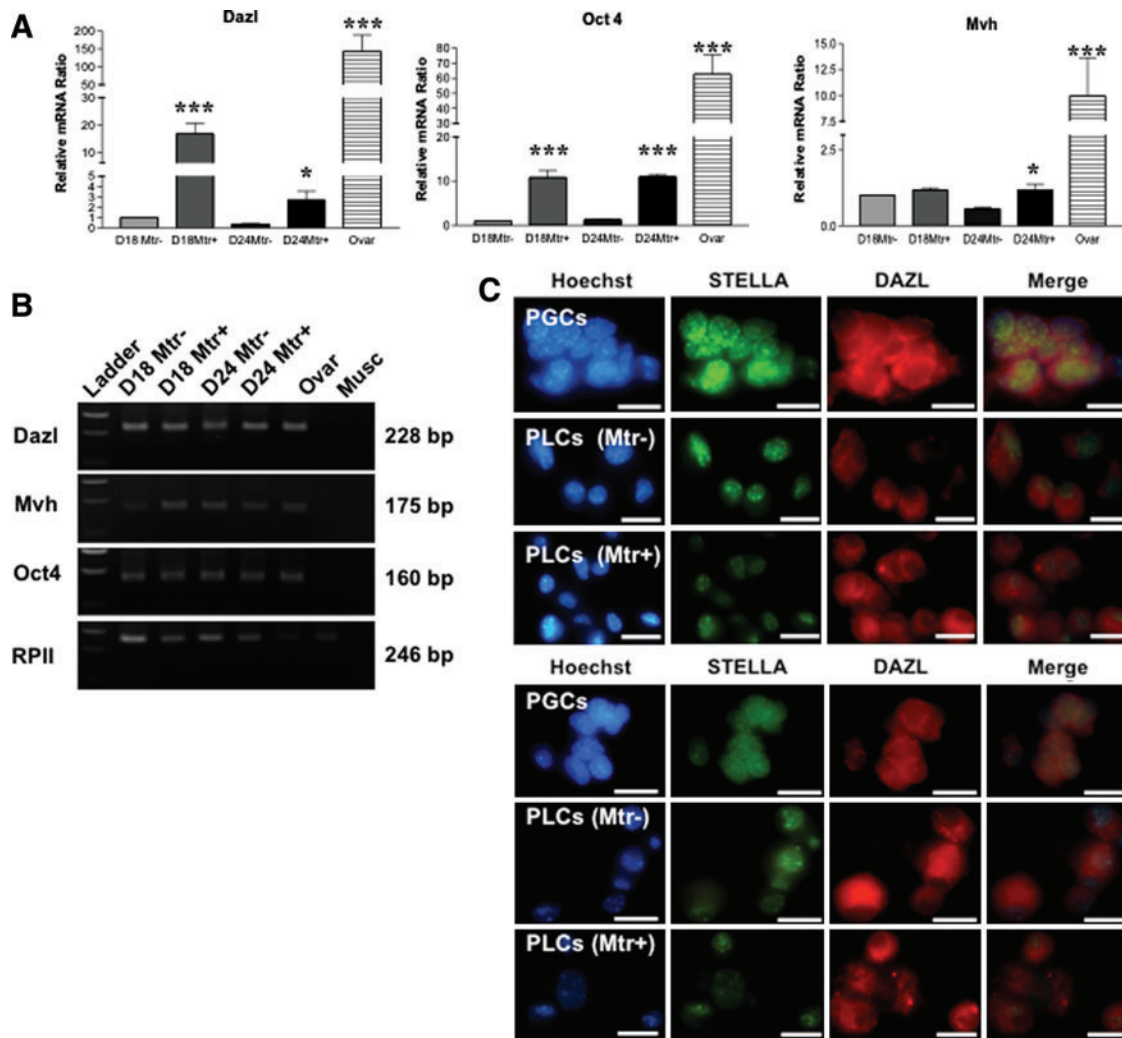

**SUPPLEMENTARY FIG. S1.** Matrigel enhances the expression of germ cell markers during SSC differentiation to ovarian-cell-like cells. SSCs were differentiated into PLCs and OLCs until D12 before being cultured with or without Matrigel (Mtr) to D18 or D24. **(A)** Relative mRNA levels of germ cell marker genes, compared to adult mouse ovary (Ovar). Culture with Matrigel showed increased gene expression compared with control cultures. Data represent the mean  $\pm$  SEM of three independent experiments. \*Significantly different from respective controls ( $P < 0.05$ ); \*\*\*( $P < 0.001$ ). **(B)** Representative images of RT-PCR products to show product sizes from **(A)**; RPII was used as reference gene and mouse muscle (Musc) was used as a negative control. **(C)** Immunocytochemical (ICC) analysis of ovarian-cell-like cells for germ cell marker expression. Double ICC for STELLA+DAZL (*upper panel*) and STELLA+MVH (*lower panel*), showing positive expression of STELLA in the nucleus, and DAZL and MVH in the cytoplasm of PLCs, a cellular localization pattern similar to 12.5 dpc mouse primordial germ cells (PGCs; *top row of both panels*).
