# Supplementary material
Source: PubMed Central journal article supplement (PMC4086351)
Supplement: Supp_Table1.pdf [file Supp_Table1.pdf]

SUPPLEMENTARY TABLE S1. INFORMATION OF PRIMERS FOR MICE CELLS AND TISSUES

| <i>Target</i> | <i>Primers</i>                                                    | <i>Accession number</i> | <i>Product size</i> |
|---------------|-------------------------------------------------------------------|-------------------------|---------------------|
| RPII          | 5'-ggtggagaggagatggacaa-3'<br>5'-gcccaacacaaaacactcct-3'          | Gi:6677794              | 246 bp              |
| Scp3          | 5'-atgatgaaactcagcagcaagaga-3'<br>5'-ttgacacaatcgtggagagaacaac-3' | BC132079                | 125 bp              |
| Vasa          | 5'-aggggatgaaagaactatggtc-3'<br>5'-agcaacaagaactgggcact-3'        | BC144760                | 175 bp              |
| Oct4          | 5'-agttggcgtggagactttgc-3'<br>5'-caggccttcatgtcctgg-3'            | NM_013633               | 160 bp              |
| Dazl          | 5'-cctccaacctgatgaatcc-3'<br>5'-gggcaaaatatcagctcctg-3'           | Gi:31542548             | 228 bp              |
| Fshr          | 5'-atcacacatgcatgcaact-3'<br>5'-gtacgaggaggccataaca-3'            | AF095642                | 199 bp              |
| Aroma         | 5'-tagcgcaagatggttcttggga-3'<br>5'-aatctgcatgggaaatgag-3'         | NM_007810               | 203 bp              |
| ER            | 5'-accattgacaagaaccggag-3'<br>5'-cctgaagcaccatttcatt-3'           | Kipp et al., 2007       | 170 bp              |
